# Supplementary material for: Role of Trichoderma reesei mitogen-activated protein kinases (MAPKs) in cellulase formation
Source: PubMed Central journal article supplement (PMC5397809; doi:10.1186/s13068-017-0789-x), 2017-04-20

**Additional File 1. Southern blotting analysis of *T. reesei* TU-6,  $\Delta tmk1-1$  and  $\Delta tmk1-$**

**2. Panel A:** Schematic drawing of strain construction and southern blotting analysis.

Panel B: southern blotting of *T. reesei* strains. M: DNA marker; TU-6: *T. reesei* TU-6;

$\Delta tmk1-1$ : *T. reesei*  $\Delta tmk1-1$ ;  $\Delta tmk1-2$ : *T. reesei*  $\Delta tmk1-2$ .

**A**

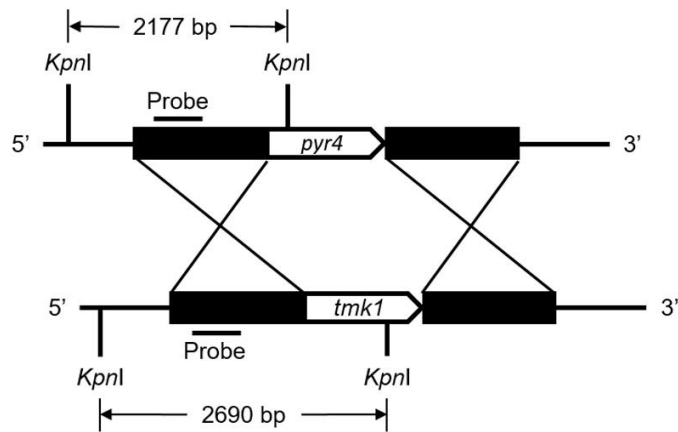

**B**

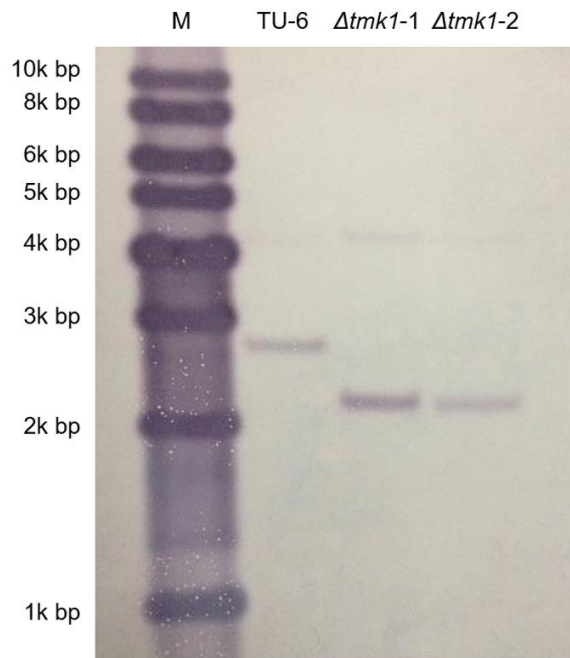

Supplement: 13068_2017_789_MOESM1_ESM.pdf [file 13068_2017_789_MOESM1_ESM.pdf]
