# Supplementary material for: Role of Trichoderma reesei mitogen-activated protein kinases (MAPKs) in cellulase formation
Source: PubMed Central journal article supplement (PMC5397809; doi:10.1186/s13068-017-0789-x), 2017-04-20

**Additional File 2. The sensitivity of *T. reesei* TU-6,  $\Delta tmk1-1$  and  $\Delta tmk1-2$  to CR and CFW.** Panel A: growth of *T. reesei* TU-6, *T. reesei*  $\Delta tmk1-1$  and *T. reesei*  $\Delta tmk1-2$  on CR-containing agar plates; Panel B: growth of *T. reesei* TU-6, *T. reesei*  $\Delta tmk1-1$  and *T. reesei*  $\Delta tmk1-2$  on CFW-containing agar plates. TU-6, *T. reesei* TU-6;  $\Delta tmk1-1$ , *T. reesei*  $\Delta tmk1-1$ ;  $\Delta tmk1-2$ , *T. reesei*  $\Delta tmk1-2$ .

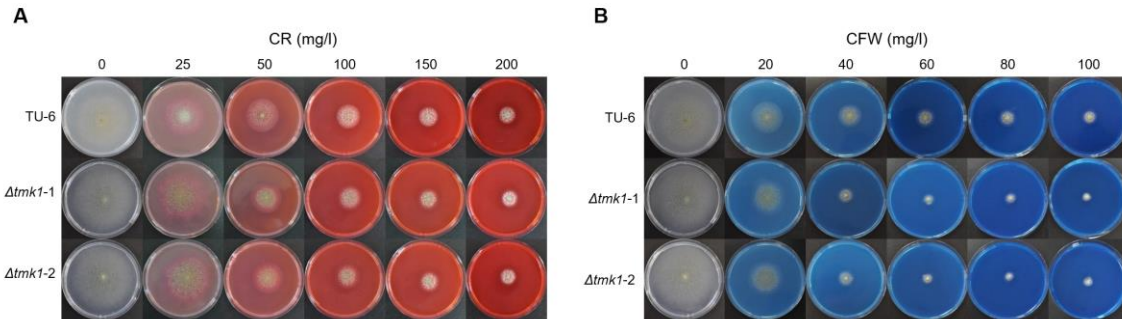

Supplement: 13068_2017_789_MOESM2_ESM.pdf [file 13068_2017_789_MOESM2_ESM.pdf]
