# Supplementary material for: Role of Trichoderma reesei mitogen-activated protein kinases (MAPKs) in cellulase formation
Source: PubMed Central journal article supplement (PMC5397809; doi:10.1186/s13068-017-0789-x), 2017-04-20

**Additional File 3. Southern blotting analysis of *T. reesei* TU-6,  $\Delta tmk2$  and**

**$\Delta tmk2::OEtmk3$ .** Panel A: Schematic drawing of strain construction and southern

blotting analysis. Panel B: southern blotting of *T. reesei* strains. M: DNA marker;  $\Delta tmk2$ :

*T. reesei*  $\Delta tmk2$ ;  $\Delta tmk2::OEtmk3$ : *T. reesei*  $\Delta tmk2::OEtmk3$ .

**A**

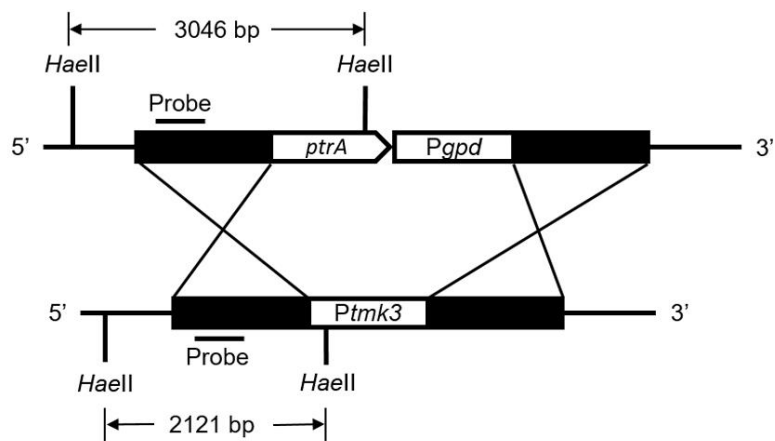

**B**

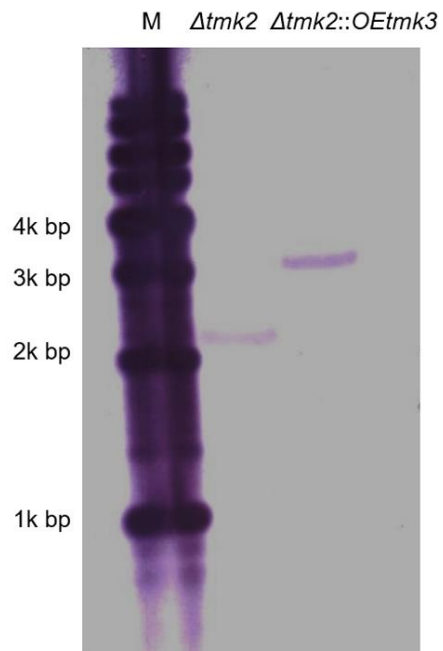

Supplement: 13068_2017_789_MOESM3_ESM.pdf [file 13068_2017_789_MOESM3_ESM.pdf]
